# Supplementary material for: Binding of an anionic fluorescent probe with calf thymus DNA and effect of salt on the probe–DNA binding: a spectroscopic and molecular docking investigation
Source: Royal Society of Chemistry journal article supplement (doi:10.1039/c4ra14298e), 2014-01-01
Supplement: c4ra14298e1.pdf [file c4ra14298e1.pdf]

## Binding of an anionic fluorescent probe with calf thymus DNA and effect of salt on the probe-DNA binding: A spectroscopic and molecular docking investigation

Saptarshi Ghosh<sup>a</sup>, Pronab Kundu<sup>a</sup>, Bijan Kumar Paul<sup>b</sup>, and Nitin Chattopadhyay<sup>a,\*</sup>

<sup>a</sup>Department of Chemistry, Jadavpur University, Kolkata - 700 032, India

<sup>b</sup>Department of Chemistry, Indian Institute of Science Education and Research Bhopal, Bhauli, Bhopal 462066, Madhya Pradesh, India

\*Corresponding author: Fax: 91-33-2414 6584

E-mail: [nitin.chattopadhyay@yahoo.com](mailto:nitin.chattopadhyay@yahoo.com)

### Electronic Supplementary Information

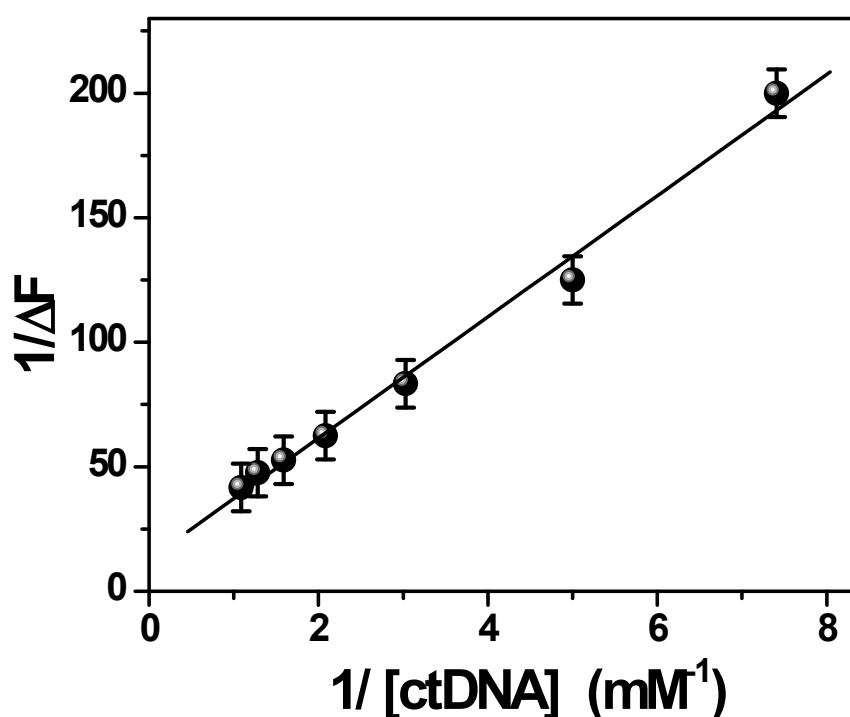

**Fig. S1** Double reciprocal plot for the binding of ANS and ctDNA from absorption data.

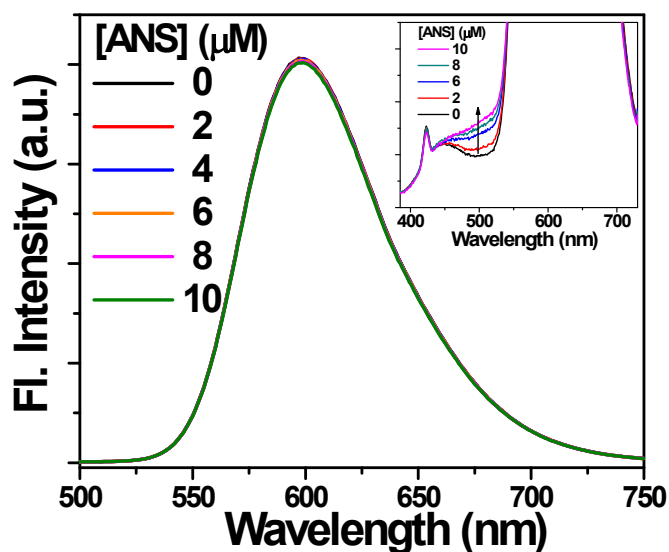

**Fig. S2** Fluorescence spectra of ctDNA bound EtBr with the addition of varying concentrations of ANS. Concentrations of ANS are labeled in the legends;  $\lambda_{\text{exc}} = 480$  nm. [ctDNA] = 1 mM and [EtBr] = 10  $\mu\text{M}$ . Inset shows the emission spectra of the same solutions in the lower wavelength range;  $\lambda_{\text{exc}} = 370$  nm.

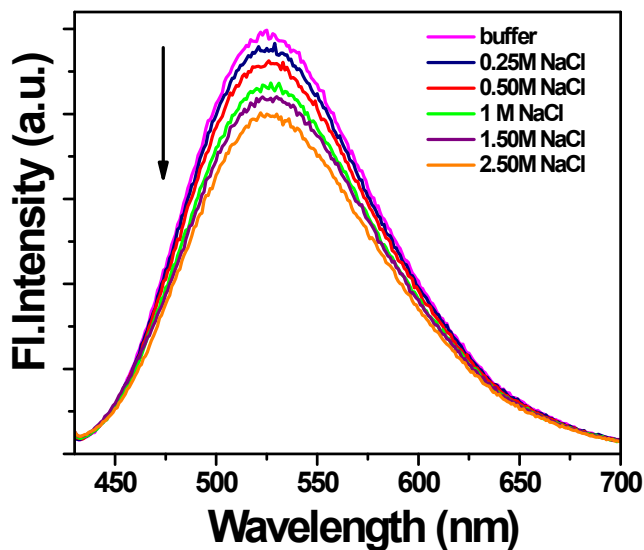

**Fig. S3** Emission spectra of ANS in the presence of different concentrations of NaCl. The concentrations of the NaCl solutions are labeled in the legends.  $\lambda_{\text{exc}} = 370$  nm. [ANS] = 10  $\mu\text{M}$ .

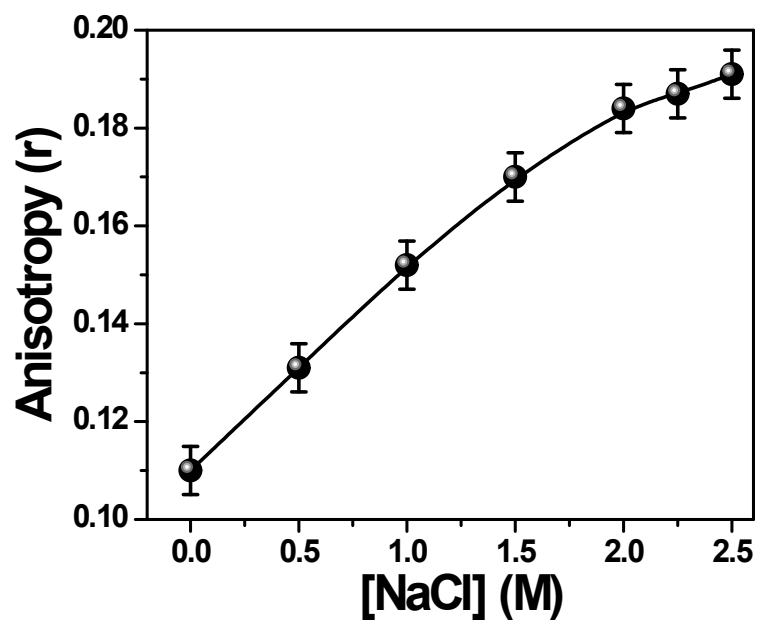

**Fig. S4** Variation of the anisotropy of the ctDNA bound ANS as a function of concentration of NaCl.  $\lambda_{\text{exc}} = 370 \text{ nm}$ ,  $\lambda_{\text{em}} = 500 \text{ nm}$ . [ctDNA] = 1.92 mM and [ANS] = 10  $\mu\text{M}$ .

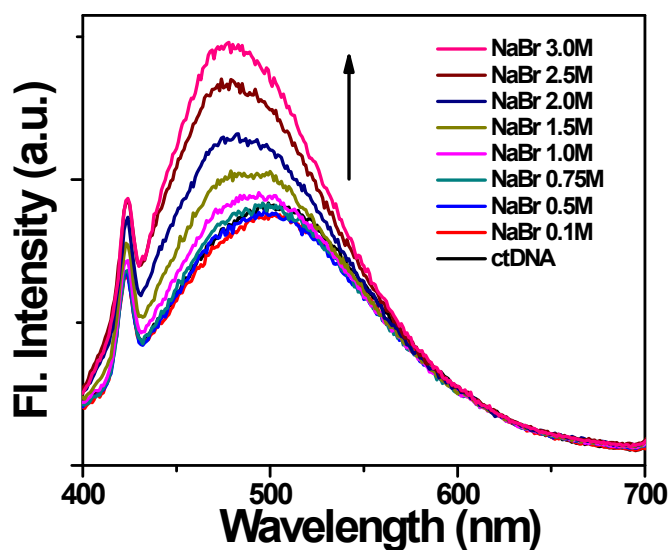

**Fig. S5** Emission profile of ctDNA bound ANS with increasing NaBr concentration. The concentrations of the NaBr solutions are labeled in the legends.  $\lambda_{\text{exc}} = 370 \text{ nm}$ . [ctDNA] = 1.92 mM and [ANS] = 10  $\mu\text{M}$ .

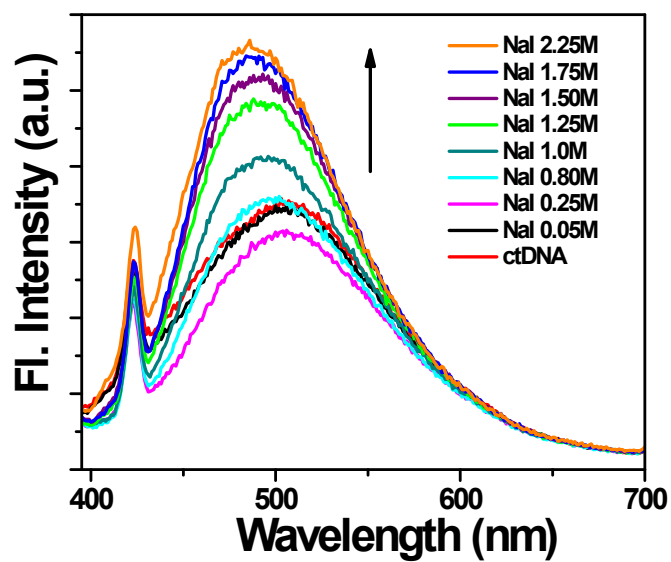

**Fig. S6** Emission profile of ctDNA bound ANS with increasing NaI concentration. The concentrations of the NaI solutions are labeled in the legends.  $\lambda_{\text{exc}} = 370$  nm. [ctDNA] = 1.92 mM and [ANS] = 10  $\mu$ M.
